# Supplementary material for: Expression of Adipose Tissue Extracellular Matrix-Related Genes Predicts Weight Loss after Bariatric Surgery
Source: MDPI journal article supplement (doi:10.3390/cells12091262), 2023-04-26
Supplement: s1 [file s1]

**Supplementary Table S1.** Clinical characteristics of the exploratory and validation cohorts.

|                 | Exploratory cohort   | Validation cohort    | p            | Pooled cohort        |
|-----------------|----------------------|----------------------|--------------|----------------------|
| N               | 75                   | 39                   |              | 114                  |
| Females (%)     | 58(77)               | 33(85)               | 0.127        | 91(80)               |
| Age             | 50.42 ± 10.10        | 51.82 ± 11.39        | 0.509        | 50.53 ± 10.65        |
| BMI             | 43.43 (41.02, 47.91) | 45.97 (40.35, 48.41) | 0.565        | 43.49 (41.01, 48.18) |
| T2D (%)         | 21(28)               | 17(44)               | 0.155        | 38(33)               |
| Type of surgery |                      |                      |              |                      |
| SG (%)          | 27(36)               | 15(39)               | >0.999       | 42(37)               |
| RYGB (%)        | 45(60)               | 24(61)               |              | 69(60)               |
| TBWL (%)        | 31.98 ± 7.97         | 29.15 ± 6.35         | <b>0.043</b> | 31.25 ± 7.72         |

Data are presented as the mean ± SD, median (95%CI) or number (%). BMI, body mass index; T2D, type 2 diabetes; SG, sleeve gastrectomy; RYGB, Roux-en-Y Gastric Bypass; TBWL, total body weight loss.

**Supplementary Table S2.** Clinical characteristics of non-obese and ex-obese subjects.

|                          | <b>non-Ob (n=17)</b> | <b>ex-Ob (n=18)</b> |
|--------------------------|----------------------|---------------------|
| <b>Sex (Female)</b>      | 13 (62%)             | 16 (89%)            |
| <b>Age</b>               | 60.81 ± 9.35         | 49.94 ± 11.87       |
| <b>Weight</b>            | 73.87 ± 12.16        | 71.13 ± 7.84        |
| <b>Height</b>            | 1.65 ± 0.11          | 1.64 ± 2.12         |
| <b>BMI</b>               | 27.12 ± 2.55         | 26.37 ± 2.12        |
| <b>FPG</b>               | 93 (84, 98)          | 81.19 ± 8.68        |
| <b>Hypertension</b>      | 4 (19%)              | 0 (0%)              |
| <b>Total cholesterol</b> | 196.6 ± 35.88        | 169.0 ± 24.55       |
| <b>HDL</b>               | 60.05 (55, 84)       | 55.88 ± 11.57       |
| <b>LDL</b>               | 104.5 ± 33.53        | 97.25 ± 17.94       |
| <b>TG</b>                | 98.23 ± 37.93        | 79.19 ± 22.07       |
| <b>AST</b>               | 20.56 ± 6.74         | 20 (17, 29)         |
| <b>ALT</b>               | 18 (14, 36)          | 21 (10, 38)         |
| <b>GGT</b>               | 32.3 ± 14.21         | 10.5 (8, 27)        |

Data are presented as the mean ± SD, median (95%CI) or number (%). BMI, body mass index; FPG, fasting plasma glucose; HDL, serum high-density lipoprotein cholesterol; LDL, serum low-density lipoprotein cholesterol; TG, serum triglycerides; AST, serum aspartate aminotransferase; ALT, serum alanine aminotransferase; GGT, gamma-glutamyl transferase.

**Supplementary Table S3.** List of primers used in the study.

| GENE         | SEQUENCE | (5'-3')                   |
|--------------|----------|---------------------------|
| ABCA1        | F        | GGAGGCCAGAATGACATCTTAG    |
| ABCA1        | R        | TTTCCAGCCCCATTAACTCC      |
| PLIN2        | F        | AGTATCCCTACCTGAAGTCTGTG   |
| PLIN2        | R        | CCCCTTACAGGCATAGGTATTG    |
| ADIPOQ       | F        | ACAATGACTCCACCTTCACAG     |
| ADIPOQ       | R        | TTCTAACCCTACTGAAAGCC      |
| ADIPOR1      | F        | TCATCTACCTCTCCATCGTCTG    |
| ADIPOR1      | R        | CACTCAAGCCAAGTCCCAG       |
| ADIPOR2      | F        | CAGCCATTATAGTCTCCAGTG     |
| ADIPOR2      | R        | CCGAGATGACATAGTGCAAGG     |
| ANGPT1       | F        | TTAAAGGACTTACAGGGACAGC    |
| ANGPT1       | R        | GACCACATGCATCAAAACAC      |
| ANGPT2       | F        | CCACGAGACTTGAACCTTCAGC    |
| ANGPT2       | R        | TGTGCTTGTCTTCCATAGCTAG    |
| ATG12        | F        | AATCAGTCTTTTGTCTCTCC      |
| ATG12        | R        | GCAAGTTGATTTTCTTTGTGTTTC  |
| ATG5         | F        | AGCAACTCTGGATGGGATTG      |
| ATG5         | R        | AGGTCTTTCAGTCGTTGTCTG     |
| ATG7         | F        | TTTTGCTACTCTGCCCTCTG      |
| ATG7         | R        | GCTGTGACTCTTCTGTTGAC      |
| ATGL         | F        | CACTTCACTCCAAGGACGAG      |
| ATGL         | R        | CTCATAGAGTGGCAGGTTGTC     |
| BGN          | F        | TGGAGAACAGTGGCTTTGAAC     |
| BGN          | R        | GTTGTGGTCTAGGTGGAGTTTC    |
| CD14         | F        | CAGAGGTTTCGGAAGACTTATCG   |
| CD14         | R        | TTCCGAGAAAGTTGCAGACG      |
| CD206 / MRC1 | F        | GCAAAGTGGATTACGTGTCTTG    |
| CD206 / MRC1 | R        | CTGTTATGTCGCTGGCAAAATG    |
| CD68         | F        | ATGGCGGTGGAGTACAATG       |
| CD68         | R        | TGGACAGCTGGTGAAGAATG      |
| COL1A1       | F        | CCCTCGGAAGAATGGAGATG      |
| COL1A1       | R        | CATCCAAACCACTGAAACCTC     |
| COL3A1       | F        | ATGGTGCTCTGGTAAGAATG      |
| COL3A1       | R        | GGTCTGTGCTCTCTTTGTC       |
| COL4A1       | F        | TGTGGATCGGCTACTCTTTTG     |
| COL4A1       | R        | TAGTAATTGCAGGTCCCACG      |
| COL5A1       | F        | TCGCTTACAGAGTCAACAAAG     |
| COL5A1       | R        | GTTGTAGATGGAGACCAGGAAG    |
| COL6A1       | F        | AGGAGTCAAGAGAGCAAAAGG     |
| COL6A1       | R        | GCATTACAGCAAGAGCAC        |
| COL6A3       | F        | AACCATTGGCTCTCACTGAAACA   |
| COL6A3       | R        | GCACAGCTTTTGGTGTGGGA      |
| DGAT2        | F        | TCCGAATGCCTGTGTTGAG       |
| DGAT2        | R        | CAATAGTCTATGGTGTCCCGG     |
| ELN          | F        | CCTGGCTTCGGATTGTCTC       |
| ELN          | R        | CAAAGGGTTTACATTCTCCACC    |
| F13A1        | F        | ATCCCATCAAAGTCAGCCG       |
| F13A1        | R        | ATGTCAACGCTTCCAGTCC       |
| FABP4        | F        | CATGTGCAGAAATGGGATGG      |
| FABP4        | R        | AACCTCAGTCCAGGTCAACG      |
| FASN         | F        | CAGAGTCGGAGAACTTGCAG      |
| FASN         | R        | GGAGGCATCAAACCTAGACAG     |
| FN1          | F        | GTGGCAGAAGGAATATCTCGG     |
| FN1          | R        | GAGAATACTGGTTGTAGGACTGG   |
| HAS1         | F        | CTTGTACAGCTACTTCCACTG     |
| HAS1         | R        | CGGTCAATCCCAAAGTACAG      |
| HAS2         | F        | CTCAATTTTGGAAACTGCCCG     |
| HAS2         | R        | CTCAGGATACATAGAAACCTCTCAC |
| HIF1A        | F        | AAGAACTTTTAGGCCGCTCA      |
| HIF1A        | R        | CAACCCAGACATATCCACCTC     |
| HSL / LIPE   | F        | TCATCTCCATCGACTACTCCC     |
| HSL / LIPE   | R        | AGATTGCTTCCCTGTTGAG       |
| HYAL1        | F        | GATGGCTGTGGAGTTCAAATG     |
| HYAL1        | R        | CCCAGAGTGCATTAGGTTCTC     |
| HYAL2        | F        | TGTGAGCTTCCGTGTTGAG       |
| HYAL2        | R        | CTCGCAATGGTATGAGATGAG     |
| IL1B         | F        | GGTACATCAGCACCTCTCAAG     |
| IL1B         | R        | CACATTCAGCACAGGACTCTC     |
| IL6          | F        | CAACCTGAACCTTCAAAGATG     |
| IL6          | R        | ACCTCAAACCTCAAAGACACAG    |
| IRS1         | F        | TCTGCTCAGCGTTGGTG         |
| IRS1         | R        | GTGCATGCTCTTGGGTTTG       |
| ITGB2        | F        | CCCCAAGTTTGCTGAGAGTTAG    |
| ITGB2        | R        | TGAGGGCGGAAAATAACTGG      |
| KLB          | F        | CATGGGTATGGGACAGGTATG     |
| KLB          | R        | TCTGATGTGGGCGGAAATG       |
| LEP          | F        | GCTTCAGGCTACTCCACAG       |
| LEP          | R        | CCTTCCCTTAACTAGTCTCTG     |
| LEPR         | F        | TCAACCACTACAATCCAGTCAC    |
| LEPR         | R        | TTTGGGCTCAGATATGGGATG     |

| GENE             | SEQUENCE | (5'-3')                   |
|------------------|----------|---------------------------|
| LOX              | F        | ACATTGCTACACAGGACATC      |
| LOX              | R        | TTCCCACTTCAGAACACCCAG     |
| LOXL2            | F        | GTGCAGCGACAAAAGGATTG      |
| LOXL2            | R        | GCGGTAGGTTGAGAGGATG       |
| LOXL4            | F        | GTGGCAGAGTCAGATTCTCC      |
| LOXL4            | R        | TTGTTCTGAGACGCTGTTTC      |
| LPL              | F        | GGACTGAGAGTGAAACCCATAC    |
| LPL              | R        | GGAAGGAGTAGGTCTTATTTGTGG  |
| MCP1 / CCL2      | F        | CCTCCAGCATGAAAGTCTCTG     |
| MCP1 / CCL2      | R        | TCTGCACTGAGATCTTCTATTG    |
| MMP13            | F        | GGAATTGGTGATAAAGTAGATGCTG |
| MMP13            | R        | ACGCGAACAATACGGTTACTC     |
| MMP14            | F        | GGATGGACACGGAGAATTITG     |
| MMP14            | R        | TTTATCAGGAACAGAAGGCCG     |
| MMP15            | F        | CCCAAGCCCATCAGGTTC        |
| MMP15            | R        | CGCTCATTTGCGAATTTCCAG     |
| MMP2             | F        | ACCCATTACACCTACACCAAG     |
| MMP2             | R        | TGTTTGAGATCTCAGGAGTG      |
| MMP9             | F        | CGAATTTGACAGCGACAAG       |
| MMP9             | R        | CACTGAGGAATGATCTAAGCCC    |
| MOGAT1           | F        | GAAAGCCATCCACACTGTTG      |
| MOGAT1           | R        | GCCATACTTTCTTTGTGTTCC     |
| MSR1             | F        | ATCTGTGAAATTTGATGCTCGC    |
| MSR1             | R        | CCAATGAGAGGGATGAGAACTG    |
| NPY1R            | F        | GATCTGAGCAGGAGAAATACCAG   |
| NPY1R            | R        | CTGAATTTCTTCACTTGAAGTG    |
| p16 / CDKN2A     | F        | GATGTCGACGGTACTCTG        |
| p16 / CDKN2A     | R        | TCTCTGGTTCTTTCAATCGGG     |
| P21 / CDKN1A     | F        | GAACCTCGACTTTGTCAACCGAGAC |
| P21 / CDKN1A     | R        | TGGAGTGGTAGAAATCTGTCATGCT |
| p53 / TP53       | F        | CAGCAGATGACGGAGGTTGT      |
| p53 / TP53       | R        | TCATCCAAATCTCCACACGC      |
| PAI-1 / SERPINE1 | F        | GTGGACTTTTCAGAGGTGGAG     |
| PAI-1 / SERPINE1 | R        | GAAGTAGAGGGCATTACCCAG     |
| PDGFRA           | F        | TTCTCTGCTGACATTGAC        |
| PDGFRA           | R        | GTCTTCAATGGTCTCGTCTC      |
| PDGFRB           | F        | ATGTGACGGAGAGTGTGAATG     |
| PDGFRB           | R        | GCAGCTCAGCAAATGTAGTG      |
| PLIN1            | F        | CATTGAGAAGGTGGTGGAGTAC    |
| PLIN1            | R        | GTGTATCGAGAGAGGGTGTG      |
| PLIN2            | F        | AGTATCCCTACCTGAAGTCTGTG   |
| PLIN2            | R        | CCCCTTACAGGCATAGGTTATTG   |
| PPARG            | F        | GTCCGTTTCAGAAATGCCTTG     |
| PPARG            | R        | GCTGGTCGATCACTGGAG        |
| PPARGC1A / PGC1A | F        | CAGGCAGTAGATCTCTTCAAG     |
| PPARGC1A / PGC1A | R        | TCCTCGTAGCTGTACATCTG      |
| RPL6 F           | F        | CTTAAATCTCTTCCCATCTTGC    |
| RPL6 R           | R        | TTCTTGGCTTCGGGTTTCTT      |
| SLC2A1 / GLUT1   | F        | TCATCGTGGCTGAATCTTC       |
| SLC2A1 / GLUT1   | R        | GATGAAGACGTAGGGACACC      |
| SLC2A4 / GLUT4   | F        | ACTGGACGAGCAACTTCATC      |
| SLC2A4 / GLUT4   | R        | GAGGACCGCAAATAGAAGGAA     |
| SREBF1           | F        | TTCTGACAGCCATGAAGACAG     |
| SREBF1           | R        | CCGCATCTACGAACTG          |
| TCF21            | F        | ATACGAGAACGGGTACATTAC     |
| TCF21            | R        | CTCGCTCCAGGTACCAAC        |
| TGFB1            | F        | ITGATGTCACCGGAGTTGTG      |
| TGFB1            | R        | GTAGTGAACCCGTTGATGTC      |
| TIMP1            | F        | CCCCTAGCGTGGACATTTATC     |
| TIMP1            | R        | AACAGGATGCCAGAAGCC        |
| TIMP2            | F        | CCCTCTGTGACTTCACTCGT      |
| TIMP2            | R        | GAGATGTAGCAGCGGATCATG     |
| TIMP3            | F        | CCTTCTGCAACTCCGACATC      |
| TIMP3            | R        | GCCTCGGTACATCTTCATCTG     |
| TNFA             | F        | AGGTCTACTTTGGGATCATTGC    |
| TNFA             | R        | GAAGAGGTTGAGGGTGTCTG      |
| UCP1             | F        | GGACTACTCCCAATCTGATGAG    |
| UCP1             | R        | AAATCCAGCGATAAGAGCCG      |
| UCP2             | F        | TCCTGAAAGCCAACTCATG       |
| UCP2             | R        | GGCAGAGTTCACTGTATCTGTC    |
| UCP3             | F        | AGAAAATACAGCGGGACTATGG    |
| UCP3             | R        | CTTGAGGATGTCGTAGGTCAC     |
| VEGFA            | F        | AGTCCAACATCACCATGCAG      |
| VEGFA            | R        | TTCCCTTTCTCGAACTGATT      |
| VEGFB            | F        | CTTAGAGCTCAACCCAGACAC     |
| VEGFB            | R        | ACCTGCTGAGTCTGAAAAG       |
| VEGFR1           | F        | TCCTCAACCTACAATCAAGTG     |
| VEGFR1           | R        | GCTCTCAATTTCTTTCCCATG     |
| VEGFR2           | F        | CATTTCAAAGGAGAAGCAGAGC    |
| VEGFR2           | R        | GAGGAATGGCATAGACCGTAC     |

F, forward; R, reverse.

**Supplementary Table S4.** Summary of multivariate regression models predicting TBWL.

| Model | Predictor  | $\beta$ | SE    | 95% CI           | p                | Adjusted R <sup>2</sup> | p                |
|-------|------------|---------|-------|------------------|------------------|-------------------------|------------------|
| 1     | Constant   | 29.394  | 1.539 | (26.35, 32.44)   | <b>&lt;0.001</b> | 0.134                   | <b>&lt;0.001</b> |
|       | Type of BS | 4.387   | 1.365 | (1.69, 7.09)     | <b>0.002</b>     |                         |                  |
|       | Age        | -0.128  | 0.061 | (-0.25, -0.01)   | <b>0.038</b>     |                         |                  |
|       | Sex        | -0.045  | 1.369 | (-2.75, 2.66)    | 0.974            |                         |                  |
|       | BMI        | 0.079   | 0.125 | (-0.17, 0.33)    | 0.529            |                         |                  |
|       | T2D        | -2.543  | 1.347 | (-5.21, 0.12)    | 0.061            |                         |                  |
| 2     | Constant   | 25.888  | 2.085 | (21.75, 30.03)   | <b>&lt;0.001</b> | 0.228                   | <b>&lt;0.001</b> |
|       | Type of BS | 6.689   | 1.749 | (3.21, 10.17)    | <b>&lt;0.001</b> |                         |                  |
|       | Age        | -0.192  | 0.075 | (-0.34, -0.04)   | <b>0.012</b>     |                         |                  |
|       | Sex        | 1.595   | 1.619 | (-1.62, 4.81)    | 0.327            |                         |                  |
|       | BMI        | 0.06    | 0.153 | (-0.25, 0.37)    | 0.697            |                         |                  |
|       | T2D        | -1.614  | 1.567 | (-4.73, 1.5)     | 0.306            |                         |                  |
|       | COL1A1     | -5.501  | 1.909 | (-9.3, -1.71)    | <b>0.005</b>     |                         |                  |
| 3     | Constant   | 26.41   | 2.048 | (22.33, 30.49)   | <b>&lt;0.001</b> | 0.306                   | <b>&lt;0.001</b> |
|       | Type of BS | 5.424   | 1.827 | (1.79, 9.06)     | <b>0.004</b>     |                         |                  |
|       | Age        | -0.146  | 0.076 | (-0.3, 0.01)     | 0.059            |                         |                  |
|       | Sex        | 2.293   | 1.593 | (-0.88, 5.47)    | 0.154            |                         |                  |
|       | BMI        | 0.145   | 0.155 | (-0.16, 0.45)    | 0.353            |                         |                  |
|       | T2D        | -1.659  | 1.542 | (-4.73, 1.41)    | 0.286            |                         |                  |
|       | COL5A1     | -24.732 | 5.58  | (-35.84, -13.62) | <b>&lt;0.001</b> |                         |                  |
| 4     | Constant   | 27.128  | 1.791 | (23.57, 30.69)   | <b>&lt;0.001</b> | 0.301                   | <b>&lt;0.001</b> |
|       | Type of BS | 6.015   | 1.603 | (2.83, 9.2)      | <b>&lt;0.001</b> |                         |                  |
|       | Age        | -0.167  | 0.069 | (-0.3, -0.03)    | <b>0.018</b>     |                         |                  |
|       | Sex        | 1.434   | 1.48  | (-1.51, 4.38)    | 0.335            |                         |                  |
|       | BMI        | 0.095   | 0.142 | (-0.19, 0.38)    | 0.503            |                         |                  |
|       | T2D        | -2.301  | 1.437 | (-5.16, 0.56)    | 0.113            |                         |                  |
|       | COL6A3     | -12.712 | 2.741 | (-18.16, -7.26)  | <b>&lt;0.001</b> |                         |                  |

Type of BS: 0-SG, 1-GBP; sex: 0-male; 1-female; T2D: 0-no; 1-yes.  $\beta$ : Beta coefficient; SE: standard error; CI: confidence interval.

# Supplementary Figure S1. Adipocyte size distribution across weight loss tertiles.

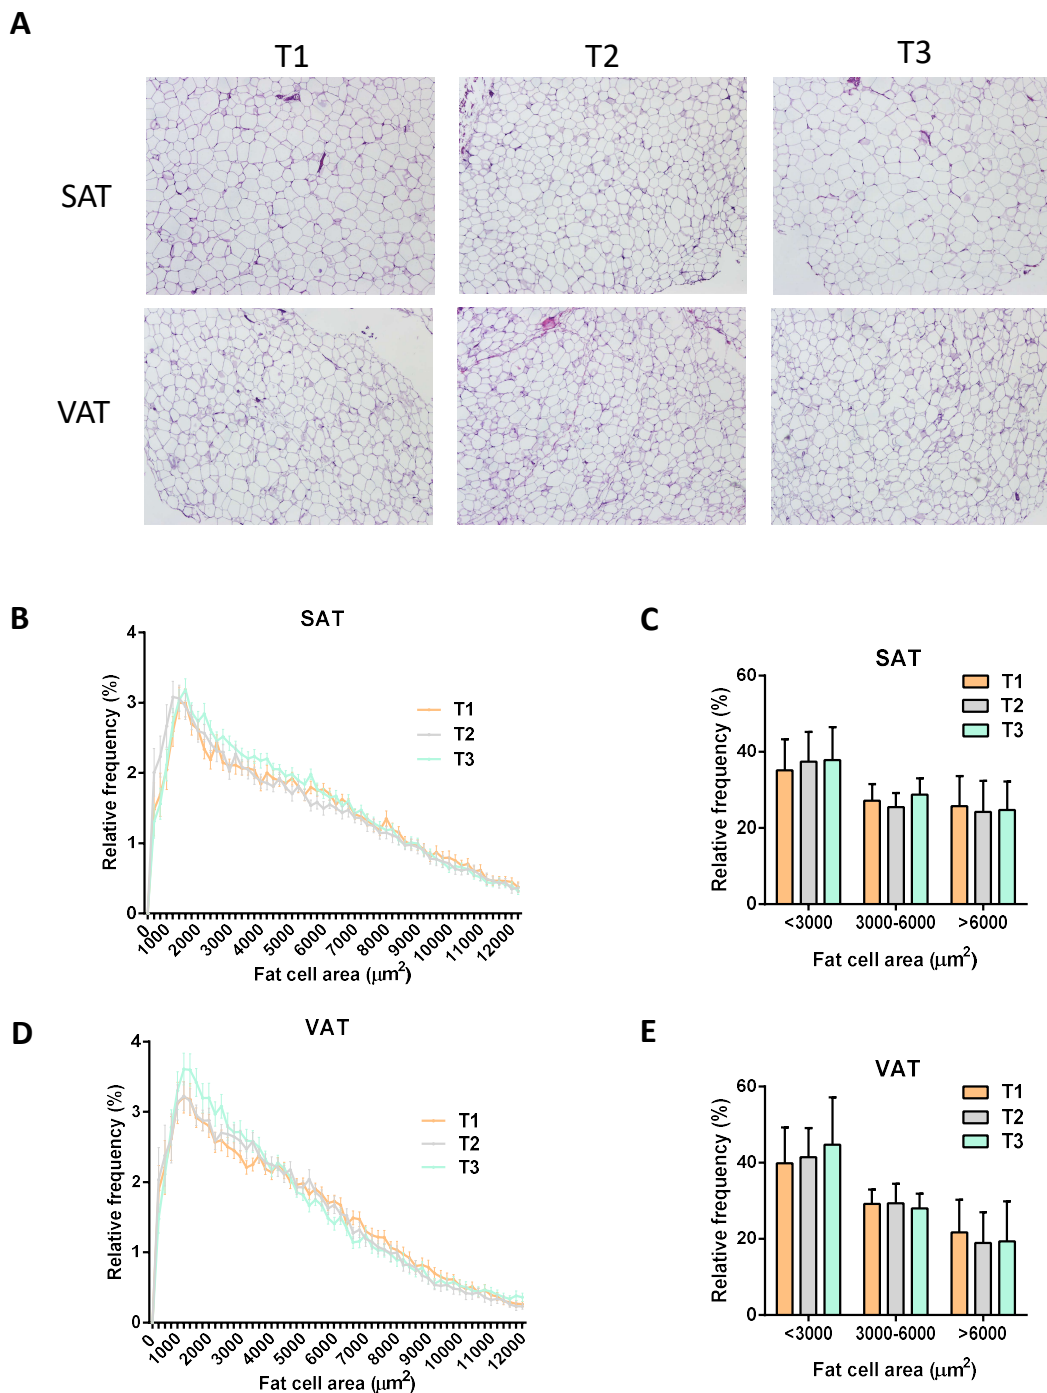

A: Representative images of hematoxylin and eosin staining of SAT and VAT samples among TBWL tertile groups. B, C: Frequency distribution analysis of fat cell areas divided by size into bin intervals of 200  $\mu\text{m}^2$  (B) and three representative sizes in SAT (C). D, E: Frequency distribution analysis of fat cell areas divided by size into bin intervals of 200  $\mu\text{m}^2$  (D) and three representative sizes in VAT (E). Data are presented as the mean  $\pm$  SD.

**Supplementary Figure S2.** Adipose tissue fibrosis across weight loss tertiles.

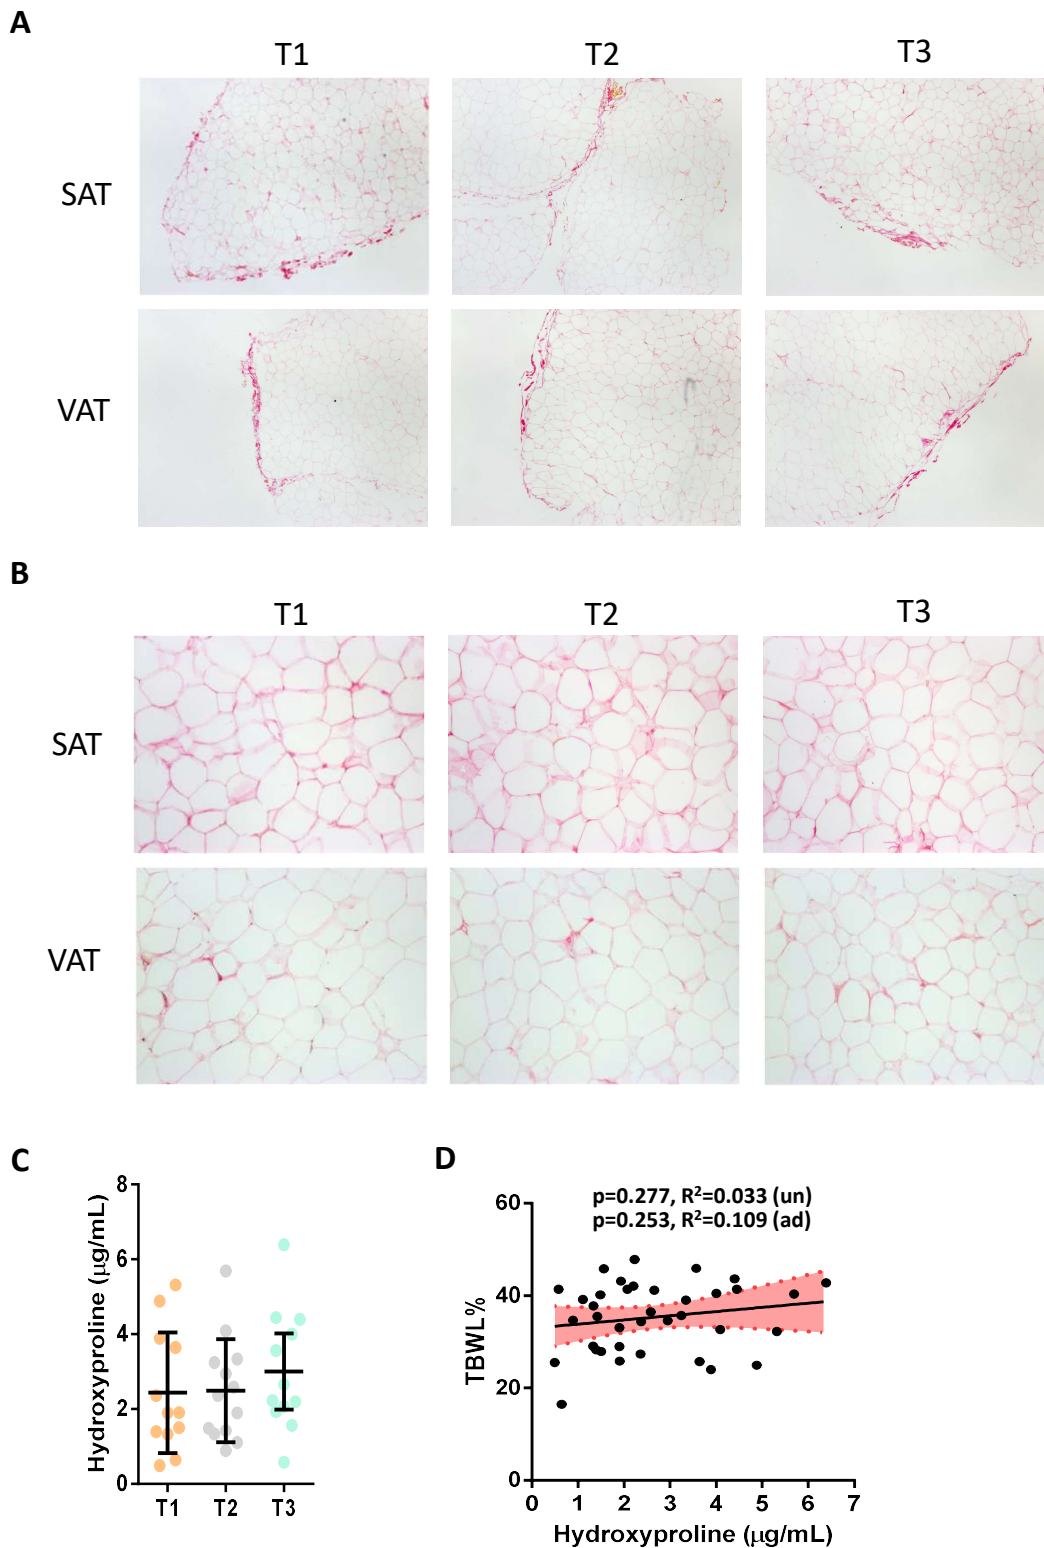

A, B: Representative images of Sirius red staining showing total (A) and pericellular fibrosis (B) in SAT and VAT samples among TBWL tertile groups. C: Determination of SAT hydroxyproline residues in TBWL tertiles. Data are presented as the mean  $\pm$  SD. D: Regression analysis between hydroxyproline concentration in SAT and TBWL%. Simple linear regression (solid line) and 95% confidence interval (dashed lines) are shown. P-values are unadjusted (un) or adjusted for sex, age, baseline BMI, T2D and type of surgery (ad).
